# Supplementary material for: Sr- and Ni-doping in ZnO nanorods synthesized by a simple wet chemical method as excellent materials for CO and CO2 gas sensing
Source: Royal Society of Chemistry journal article supplement (doi:10.1039/c6ra15891a), 2016-01-01
Supplement: c6ra15891a1.pdf [file c6ra15891a1.pdf]

## Supporting Information

### Sr- and Ni-doping in ZnO nanorods synthesized by simple wet chemical method as excellent materials for CO and CO<sub>2</sub> gas sensing

Parasharam M. Shirage<sup>1,†</sup>, Amit Kumar Rana<sup>1</sup>, Yogendra Kumar<sup>1</sup>, Somaditya Sen<sup>1</sup>, S. G. Leonardi<sup>2</sup>  
and G. Neri<sup>2,\*</sup>

<sup>1</sup>Department of Metallurgical Engineering and Materials Science and Physics, Indian Institute of Technology Indore, Simrol Campus, Khandwa Road, Indore 453552, India

<sup>2</sup>Department of Engineering, University of Messina, Messina 98166, Italy.

<sup>†</sup>Author for correspondence (E-mail- pmshirage@iiti.ac.in, paras.shirage@gmail.com)

\* Email: gneri@unime.it

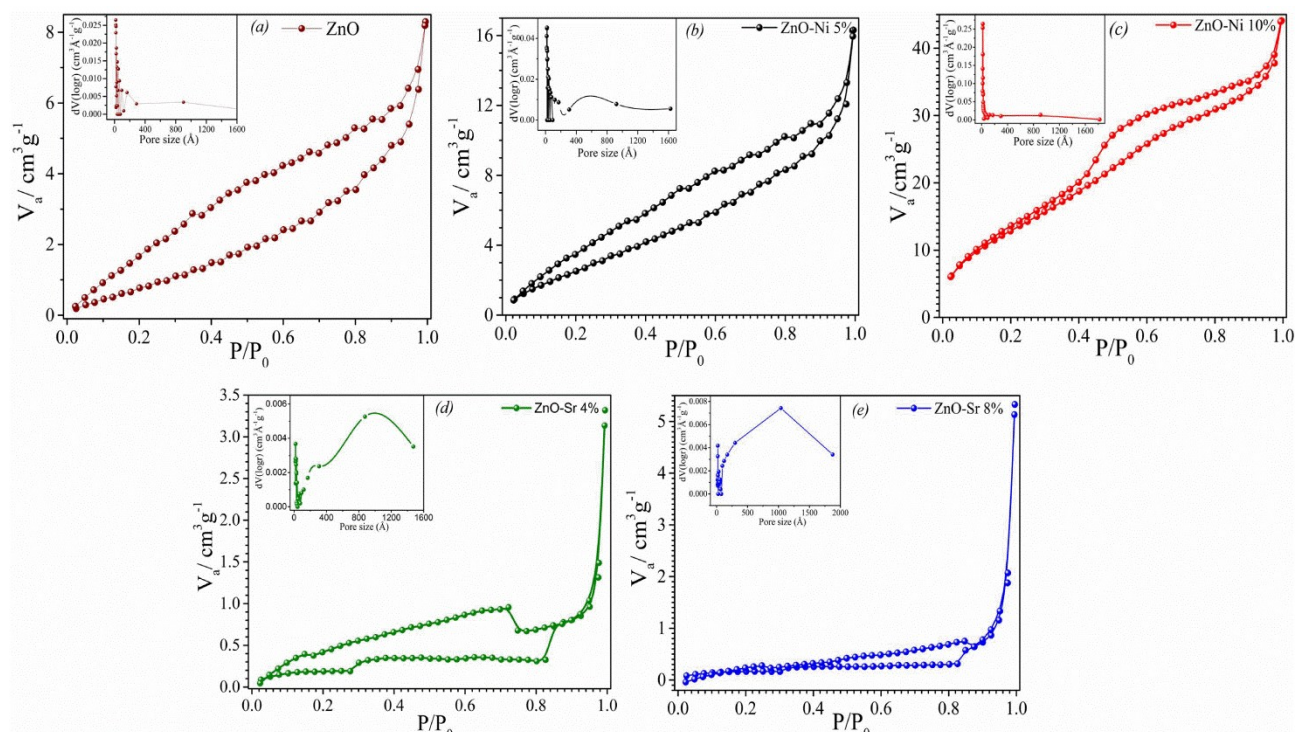

Figure S1. N<sub>2</sub> adsorption/desorption isotherms of pure and doped ZnO (inset show the corresponding pore size distribution curve).

| Sample    | Surface Area (m <sup>2</sup> /g) |
|-----------|----------------------------------|
| ZnO       | 4.359                            |
| ZnO-Ni5%  | 12.029                           |
| ZnO-Ni10% | 51.844                           |
| ZnO-Sr4%  | 0.729                            |
| ZnO-Sr8%  | 0.524                            |

Table S1. Surface area values for the synthesized samples.

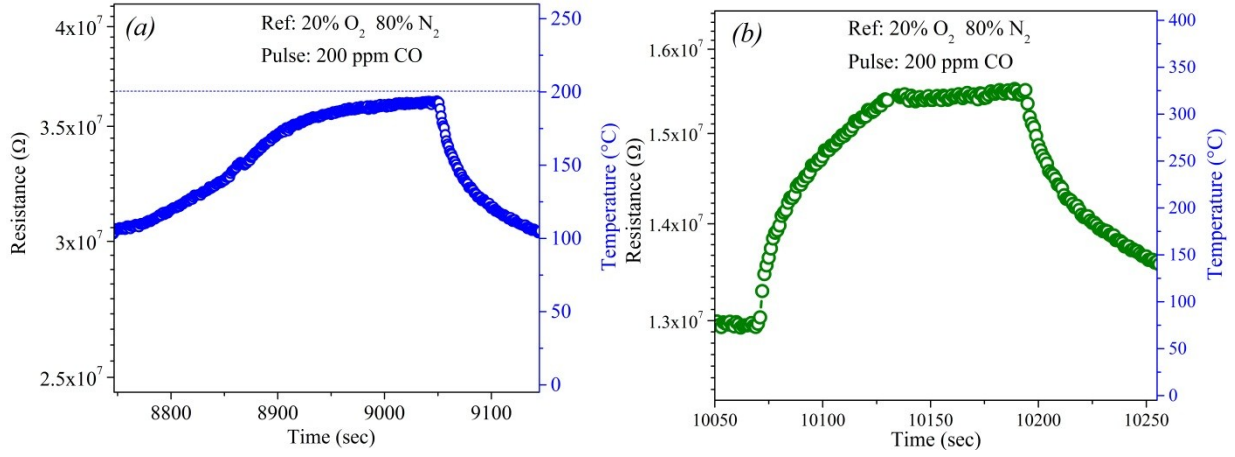

Figure S2. Dynamic responses of sensors (a) ZO and (b) Sr8ZO, to 200 ppm of CO at 200 °C.
